# Supplementary material
Source: publisher figshare collection journal article supplement (https://tandf.figshare.com/ndownloader/files/31958247)
Supplement: Supplementary file 1 [file 31958247]

Supplementary Table 1. Average [DOC], SUVA254, and S275-295 data at beginning (Day 0) and end (Day 7) of dust + light and bacteria + light experiments, n = 3. The dust addition experiment for soil water was incubated in dark conditions only.

|  |  |  | [DOC]  (mg L-1) | | SUVA254  (L mg C-1 m-1) | | S275-295  (nm-1) | |
| --- | --- | --- | --- | --- | --- | --- | --- | --- |
| Experiment | Lake | Treatment | Day 0 | Day 7 | Day 0 | Day 7 | Day 0 | Day 7 |
| Dust + light | SS2 | Dark + no dust | 24.1 ± 0.0 | 24.1 ± 0.1 | 1.42 ± 0.02 | 1.22 ± 0.01 | -0.029 ± 0.001 | -0.035 ± 0.000 |
| Dark + dust | 24.1 ± 0.2 | 24.4 ± 0.2 | 1.41 ± 0.03 | 1.40 ± 0.01 | -0.029 ± 0.000 | -0.030 ± 0.000 |
| Light + no dust | 24.5 ± 0.1 | 26.0 ± 0.2 | 1.39 ± 0.01 | 1.11 ± 0.00 | -0.029 ±0.000 | -0.035 ± 0.000 |
| Light + dust | 24.6 ± 0.0 | 25.9 ± 0.2 | 1.39 ± 0.02 | 1.30 ± 0.01 | -0.029 ± 0.001 | -0.030 ± 0.000 |
| SS1381 | Dark + no dust | 26.7 ± 0.2 | 26.4 ± 0.1 | 0.96 ± 0.03 | 0.96 ± 0.00 | -0.025 ± 0.001 | -0.025 ± 0.000 |
| Dark + dust | 26.4 ± 0.1 | 26.5 ± 0.0 | 0.95 ± 0.01 | 0.95 ± 0.01 | -0.026 ± 0.000 | -0.026 ± 0.000 |
| Light + no dust | 26.7 ± 0.2 | 29.6 ± 0.1 | 0.92 ± 0.03 | 0.78 ± 0.00 | -0.026 ± 0.000 | -0.028 ± 0.001 |
| Light + dust | 26.5 ± 0.1 | 29.7 ± 0.3 | 0.96 ± 0.00 | 0.77 ± 0.00 | -0.026 ± 0.001 | -0.027 ± 0.001 |
| SS901 | Dark + no dust | 7.4 ± 0.0 | 7.8 ± 0.3 | 1.69 ± 0.00 | 1.59 ± 0.05 | -0.025 ± 0.000 | -0.026 ± 0.000 |
| Dark + dust | 7.3 ± 0.1 | 8.2 ± 0.7 | 1.70 ± 0.01 | 1.49 ± 0.12 | -0.025 ± 0.000 | -0.026 ± 0.000 |
| Light + no dust | 7.4 ± 0.0 | 9.9 ± 0.4 | 1.74 ± 0.04 | 1.10 ± 0.03 | -0.025 ± 0.000 | -0.031 ± 0.001 |
| Light + dust | 7.5 ± 0.0 | 10.5 ± 0.5 | 1.68 ± 0.02 | 1.05 ± 0.02 | -0.025 ± 0.001 | -0.032 ± 0.000 |
| Soil water | No dust | 69.5 ± 1.0 | 51.5 ± 0.7 | 3.63 ± 0.09 | 4.95 ± 0.05 | -0.013 ± 0.000 | -0.012 ± 0.000 |
| Dust | 66.2 ± 2.4 | 51.8 ± 1.0 | 3.76 ± 0.13 | 4.88 ± 0.07 | -0.012 ± 0.000 | -0.012 ± 0.000 |

Supplementary Table 1 continued.

|  |  |  | [DOC]  (mg L-1) | | SUVA254  (L mg C-1 m-1) | | S275-295  (nm-1) | |
| --- | --- | --- | --- | --- | --- | --- | --- | --- |
| Experiment | Lake | Treatment | Day 0 | Day 7 | Day 0 | Day 7 | Day 0 | Day 7 |
| Bacteria + light | SS2 | Dark + filtered | 28.2 ± 0.1 | 28.8 ± 0.3 | 1.24 ± 0.00 | 1.22 ± 0.01 | -0.030 ± 0.000 | -0.031 ± 0.000 |
| Dark + inoculated | 27.4 ± 0.1 | 27.8 ± 0.0 | 1.28 ± 0.01 | 1.26 ± 0.01 | -0.030 ± 0.000 | -0.031 ± 0.000 |
| Light + filtered | 28.2 ± 0.1 | 28.3 ± 0.1 | 1.23 ± 0.00 | 1.10 ± 0.01 | -0.031 ± 0.000 | -0.034 ± 0.000 |
| Light + inoculated | 27.3 ± 0.1 | 27.3 ± 0.2 | 1.27 ± 0.01 | 1.11 ± 0.00 | -0.031 ± 0.000 | -0.035 ± 0.000 |
| SS1381 | Dark + filtered | 32.8 ± 0.1 | 33.2 ± 0.1 | 0.89 ± 0.01 | 0.87 ± 0.00 | -0.034 ± 0.001 | -0.035 ± 0.001 |
| Dark + inoculated | 33.0 ± 0.1 | 33.2 ± 0.0 | 0.87 ± 0.00 | 0.87 ± 0.00 | -0.035 ± 0.000 | -0.035 ± 0.001 |
| Light + filtered | 32.6 ± 0.1 | 33.4 ±0.2 | 0.89 ± 0.01 | 0.79 ± 0.00 | -0.034 ± 0.000 | -0.039 ± 0.001 |
| Light + inoculated | 33.0 ± 0.2 | 33.6 ± 0.1 | 0.87 ± 0.01 | 0.79 ± 0.00 | -0.035 ± 0.001 | -0.038 ± 0.000 |
| SS901 | Dark + filtered | 7.6 ± 0.0 | 8.0 ± 0.2 | 1.59 ± 0.02 | 1.45 ± 0.11 | -0.025 ± 0.000 | -0.027 ± 0.001 |
| Dark + inoculated | 7.7 ± 0.0 | 8.5 ± 0.8 | 1.56 ± 0.01 | 1.25 ± 0.38 | -0.026 ± 0.000 | -0.027 ± 0.001 |
| Light + filtered | 7.6 ± 0.0 | 8.3 ± 0.5 | 1.62 ± 0.02 | 1.25 ± 0.20 | -0.025 ± 0.000 | -0.030 ± 0.000 |
| Light + inoculated | 7.6 ± 0.0 | 8.0 ± 0.0 | 1.60 ± 0.02 | 1.33 ± 0.06 | -0.026 ± 0.000 | -0.029 ± 0.002 |
